# Supplementary material for: Sodium and Potassium Concentrations and Somatic Cell Count of Human Milk Produced in the First Six Weeks Postpartum and Their Suitability as Biomarkers of Clinical and Subclinical Mastitis
Source: MDPI journal article supplement (doi:10.3390/nu14224708), 2022-11-08
Supplement: s1 [file s1]

*Supplementary materials for*

## **Sodium and potassium concentrations and somatic cell count of human milk produced in the first six weeks postpartum and their suitability as biomarkers of clinical and subclinical mastitis**

**Figure S1.** Comparisons of Na concentrations, K concentrations, Na/K, SCC between breasts within subjects during clinical mastitis.

**Figure S2.** Analysis of biomarkers in milk produced by women with and without clinical mastitis.

**Table S1.** Self-reported perinatal- and lactation-related characteristics of participants who were healthy for the entire study and those who developed clinical mastitis.

**Table S2.** Na concentrations, K concentrations, Na/K, and SCC summary measurements during the first 6 weeks postpartum in lactating women without clinical mastitis ( $n=31$ ).

**Table S3.** Na concentrations, K concentrations, Na/K, and SCC summary measurements of milk samples produced during clinical mastitis in the first 6 weeks of lactation.

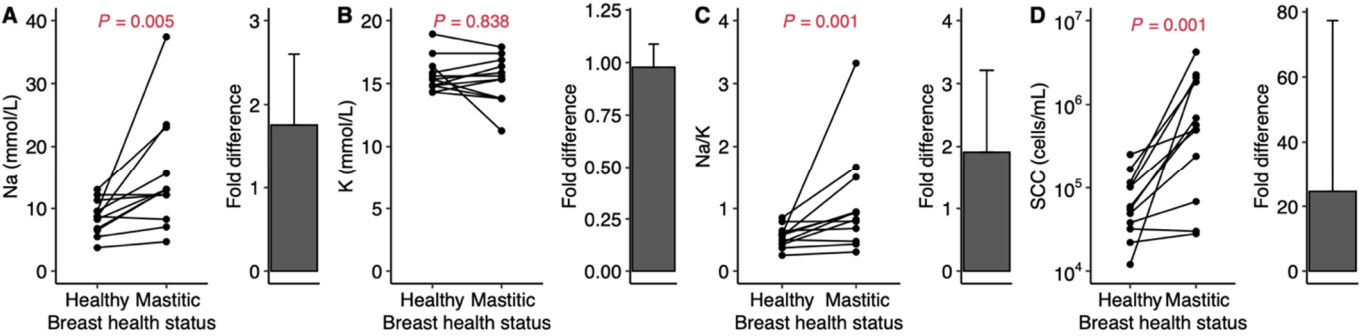

**Figure S1.** Comparisons of Na concentrations, K concentrations, Na/K, SCC between breasts within subjects during clinical mastitis. (A) Na, (B) K, (C) Na/K, and (D);  $n=12$  paired healthy and mastitic breast observations.  $P$ -values were calculated from Wilcoxon signed rank tests.

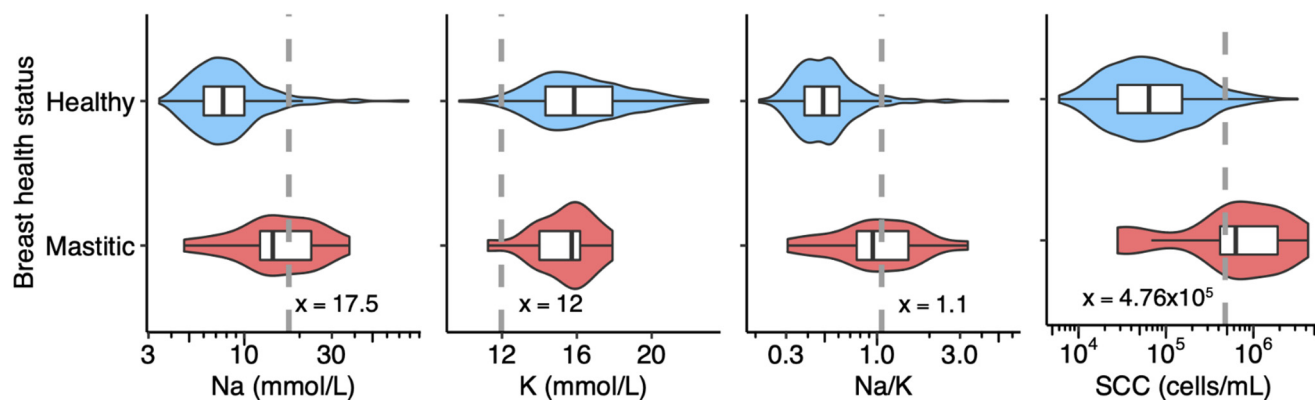

**Figure S2.** Analysis of biomarkers in milk produced by women with and without clinical mastitis. Distribution of biomarker concentrations in healthy (Na, K, and Na/K,  $n=468$ ; SCC,  $n=473$ ) and clinical mastitis (Na, K, Na/K, and SCC,  $n=16$ ) milk samples. The inner box-and-whiskers plots show the median (middle line), first and third quartiles (lower/upper line), and 1.5 times the first and third quartiles (whiskers). The vertical dotted lines along the x-axes correspond to the logistic regression-derived biomarker thresholds for clinical mastitis.

**Table S1.** Self-reported perinatal- and lactation-related characteristics of participants who were healthy for the entire study and those who developed clinical mastitis.

| Characteristic                                                       | Total      | Healthy    | Mastitis   | P      |
|----------------------------------------------------------------------|------------|------------|------------|--------|
| Participants                                                         | 41 (100)   | 31 (76)    | 10 (24)    | -      |
| Alcohol use during pregnancy                                         | 12 (29)    | 8 (26)     | 4 (40)     | 0.441  |
| Tobacco use during pregnancy                                         | 2 (5)      | 2 (8)      | 0          | >0.999 |
| Marijuana use during pregnancy                                       | 1 (2)      | 1 (3)      | 0          | >0.999 |
| Complications during pregnancy/delivery                              | 24 (59)    | 16 (52)    | 8 (80)     | 0.152  |
| Infections during pregnancy/delivery                                 | 13 (32)    | 10 (32)    | 3 (30)     | >0.999 |
| Bacterial vaginosis                                                  | 1 (2)      | 0          | 1 (10)     | -      |
| Chorioamnionitis                                                     | 1 (2)      | 0          | 1 (10)     | -      |
| Group B <i>Streptococcus</i>                                         | 4 (10)     | 3 (10)     | 1 (10)     | -      |
| Herpes                                                               | 2 (5)      | 2 (6)      | 0          | -      |
| Lower urinary tract infection                                        | 3 (7)      | 3 (10)     | 0          | -      |
| Other                                                                | 2 (5)      | 2 (6)      | 0          | -      |
| Perceived stress during birth, median (IQR), 1-10 scale <sup>1</sup> | 6 (3-8)    | 6 (3-8)    | 6 (5-7)    | 0.748  |
| Skin-to-skin within 1 hr of birth                                    | 34 (83)    | 25 (81)    | 9 (90)     | 0.660  |
| Infant feeding plans at delivery                                     |            |            |            | 0.376  |
| Exclusively at the breast                                            | 30 (73)    | 24 (77)    | 6 (60)     |        |
| Mix of at the breast and expressed milk                              | 10 (24)    | 6 (19)     | 4 (40)     |        |
| Mix of at the breast, expressed milk, and formula                    | 1 (2)      | 1 (3)      | 0 (0)      |        |
| Infant first breastfed after delivery                                |            |            |            | 0.712  |
| <1 hr                                                                | 31 (76)    | 23 (74)    | 8 (80)     |        |
| 1-3 hr                                                               | 8 (20)     | 6 (19)     | 2 (20)     |        |
| >3 hr                                                                | 2 (5)      | 2 (6)      | 0          |        |
| Reported barriers to breastfeeding <sup>2</sup>                      | 6 (15)     | 5 (16)     | 1 (10)     | >0.999 |
| Pumping milk, first 120 hours postpartum                             | 23 (56)    | 16 (52)    | 7 (70)     | 0.467  |
| Time between delivery and first pumping, median (IQR), h             | 72 (48-96) | 84 (66-96) | 72 (48-72) | 0.150  |
| Within 3 days of delivery                                            |            |            |            |        |
| Had access to a lactation consultant                                 | 19 (46)    | 15 (48)    | 4 (40)     | 0.727  |
| Experienced nipple damage                                            | 20 (49)    | 15 (48)    | 5 (50)     | >0.999 |
| Infant feeding status, first week <sup>3</sup>                       |            |            |            | 0.304  |
| Exclusively at the breast                                            | 25 (63)    | 21 (68)    | 4 (44)     |        |
| Mix of at the breast and expressed milk                              | 10 (25)    | 6 (19)     | 4 (44)     |        |
| Mix of at the breast and/or expressed milk with formula              | 5 (12)     | 4 (13)     | 1 (11)     |        |
| Exclusively fed infant human milk during entire study                | 35 (85)    | 26 (84)    | 9 (90)     | >0.999 |
| Exclusively fed infant at the breast during entire study             | 9 (22)     | 6 (19)     | 3 (30)     | 0.662  |
| Nipple shield use                                                    | 10 (24)    | 7 (23)     | 3 (30)     | 0.683  |
| Nipple cream use                                                     | 33 (80)    | 24 (77)    | 9 (90)     | 0.653  |
| Infant diagnosed with tongue tie                                     | 2 (5)      | 1 (3)      | 1 (10)     | 0.433  |

IQR, interquartile range. Values are given as numeric counts and percentages or IQR in parentheses. Percentages may not sum to 100 due to rounding. *P*-values were calculated from Wilcoxon rank sum tests for continuous data and Fisher's exact tests for categorical data. <sup>1</sup>Stress during birth was ranked from 1 (no stress) to 10 (severe stress); <sup>2</sup>Reported barriers to breastfeeding included cesarean section, difficulty latching, neonatal intensive care unit stay, and infant respiratory problems; <sup>3</sup>Missing data from 1 participant with clinical mastitis.

**Table S2.** Na concentrations, K concentrations, Na/K, and SCC summary measurements during the first 6 weeks postpartum in lactating women without clinical mastitis ( $n=31$ ).

|                                                 | Week 1                        | Week 2                         | Week 3                          | Week 4                         | Week 5                         | Week 6                        |
|-------------------------------------------------|-------------------------------|--------------------------------|---------------------------------|--------------------------------|--------------------------------|-------------------------------|
| <b>Na (mmol/L)</b>                              |                               |                                |                                 |                                |                                |                               |
| Left breast                                     | 11.8 (10.3-13.5) <sup>a</sup> | 9.5 (8.3-10.9) <sup>b</sup>    | 8.5 (7.4-9.8) <sup>bc</sup>     | 7.4 (6.5-8.5) <sup>cd</sup>    | 7.3 (6.3-8.3) <sup>cd</sup>    | 6.2 (5.4-7.1) <sup>d</sup>    |
| Right breast                                    | 12.0 (10.5-13.8) <sup>a</sup> | 9.5 (8.3-10.8) <sup>b</sup>    | 8.4 (7.3-9.6) <sup>bc</sup>     | 7.7 (6.8-8.9) <sup>bcd</sup>   | 6.9 (6.0-7.9) <sup>cd</sup>    | 6.5 (5.7-7.4) <sup>d</sup>    |
| Left/right mean                                 | 11.9 (10.5-13.4) <sup>a</sup> | 9.5 (8.4-10.7) <sup>b</sup>    | 8.5 (7.5-9.5) <sup>bc</sup>     | 7.6 (6.7-8.6) <sup>cd</sup>    | 7.1 (6.3-8.0) <sup>de</sup>    | 6.3 (5.6-7.2) <sup>e</sup>    |
| <b>K (mmol/L)</b>                               |                               |                                |                                 |                                |                                |                               |
| Left breast                                     | 18.8 (18.0-19.6) <sup>a</sup> | 16.4 (15.7-17.1) <sup>b</sup>  | 15.5 (14.9-16.2) <sup>bc</sup>  | 15.4 (14.8-16.0) <sup>bc</sup> | 15.2 (14.6-15.8) <sup>c</sup>  | 14.8 (14.2-15.5) <sup>c</sup> |
| Right breast                                    | 18.6 (17.8-19.4) <sup>a</sup> | 16.2 (15.5-16.8) <sup>b</sup>  | 15.3 (14.7-16.0) <sup>bc</sup>  | 15.6 (14.9-16.2) <sup>bc</sup> | 15.3 (14.6-15.9) <sup>bc</sup> | 14.6 (14.0-15.3) <sup>c</sup> |
| Left/right mean                                 | 18.7 (18.0-19.4) <sup>a</sup> | 16.3 (15.7-16.9) <sup>b</sup>  | 15.4 (14.9-16.0) <sup>c</sup>   | 15.5 (14.9-16.0) <sup>c</sup>  | 15.2 (14.7-15.8) <sup>cd</sup> | 14.7 (14.2-15.3) <sup>d</sup> |
| <b>Na/K</b>                                     |                               |                                |                                 |                                |                                |                               |
| Left breast                                     | 0.63 (0.55-0.72) <sup>a</sup> | 0.58 (0.51-0.67) <sup>ab</sup> | 0.55 (0.48-0.63) <sup>ab</sup>  | 0.48 (0.42-0.55) <sup>bc</sup> | 0.48 (0.42-0.55) <sup>bc</sup> | 0.42 (0.36-0.48) <sup>c</sup> |
| Right breast                                    | 0.65 (0.56-0.74) <sup>a</sup> | 0.59 (0.51-0.67) <sup>ab</sup> | 0.55 (0.48-0.63) <sup>abc</sup> | 0.50 (0.43-0.57) <sup>bc</sup> | 0.45 (0.39-0.52) <sup>c</sup>  | 0.44 (0.38-0.51) <sup>c</sup> |
| Left/right mean                                 | 0.64 (0.57-0.72) <sup>a</sup> | 0.58 (0.52-0.66) <sup>ab</sup> | 0.55 (0.49-0.62) <sup>bc</sup>  | 0.49 (0.44-0.55) <sup>cd</sup> | 0.46 (0.41-0.52) <sup>d</sup>  | 0.43 (0.38-0.48) <sup>d</sup> |
| <b>SCC (cells/mL, <math>\times 10^5</math>)</b> |                               |                                |                                 |                                |                                |                               |
| Left breast                                     | 0.95 (0.65-1.38) <sup>a</sup> | 0.95 (0.65-1.39) <sup>a</sup>  | 0.85 (0.58-1.23) <sup>a</sup>   | 0.75 (0.52-1.10) <sup>ab</sup> | 0.70 (0.48-1.03) <sup>ab</sup> | 0.42 (0.29-0.62) <sup>b</sup> |
| Right breast                                    | 0.80 (0.55-1.17) <sup>a</sup> | 0.79 (0.54-1.15) <sup>a</sup>  | 0.81 (0.55-1.17) <sup>a</sup>   | 0.88 (0.60-1.28) <sup>a</sup>  | 0.61 (0.42-0.89) <sup>a</sup>  | 0.56 (0.38-0.82) <sup>a</sup> |
| Left/right mean                                 | 0.87 (0.63-1.19) <sup>a</sup> | 0.87 (0.63-1.19) <sup>a</sup>  | 0.83 (0.60-1.13) <sup>a</sup>   | 0.81 (0.59-1.12) <sup>a</sup>  | 0.66 (0.48-0.90) <sup>ab</sup> | 0.49 (0.35-0.67) <sup>b</sup> |

Values represent model-based estimates, means (95% confidence intervals). There were no differences in any measure between breasts ( $P \geq 0.05$ ). Letters denote significance groups within breast over time, Tukey's method  $P < 0.05$ .

**Table S3.** Na concentrations, K concentrations, Na/K, and SCC summary measurements of milk samples produced during clinical mastitis in the first 6 weeks of lactation.

|                                        | Week 1        | Week 2        | Week 3       | Week 4        | Week 5 | Week 6       |
|----------------------------------------|---------------|---------------|--------------|---------------|--------|--------------|
| <b>Na (mmol/L)</b>                     |               |               |              |               |        |              |
| Left breast                            | 17.4 ± 12.9   | 23.3 ± 0.3    | 15.4 ± 3.4   | 7.1           | -      | -            |
| Right breast                           | 24.8          | 24.8 ± 17.8   | 16.8 ± 5.2   | 13.9 ± 2.5    | -      | 8.9 ± 5.9    |
| Left/right mean                        | 21.1 ± 5.2    | 24.0 ± 1.1    | 16.1 ± 0.9   | 10.5 ± 4.9    | -      | -            |
| <b>K (mmol/L)</b>                      |               |               |              |               |        |              |
| Left breast                            | 16.8 ± 0.9    | 14.7 ± 1.3    | 15.9 ± 0     | 16.4          | -      | -            |
| Right breast                           | 16.1          | 13.3 ± 2.9    | 13.9 ± 0.2   | 17.4 ± 0.7    | -      | 14.6 ± 1.1   |
| Left/right mean                        | 16.4 ± 0.5    | 14.0 ± 1.0    | 14.9 ± 1.4   | 16.9 ± 0.7    | -      | -            |
| <b>Na/K</b>                            |               |               |              |               |        |              |
| Left breast                            | 1.06 ± 0.83   | 1.59 ± 0.12   | 0.97 ± 0.21  | 0.43          | -      | -            |
| Right breast                           | 1.54          | 2.06 ± 1.79   | 1.19 ± 0.36  | 0.80 ± 0.18   | -      | 0.63 ± 0.45  |
| Left/right mean                        | 1.30 ± 0.34   | 1.82 ± 0.33   | 1.09 ± 0.16  | 0.62 ± 0.26   | -      | -            |
| <b>SCC (cells/mL, x10<sup>5</sup>)</b> |               |               |              |               |        |              |
| Left breast                            | 10.20 ± 14.03 | 13.83 ± 12.47 | 14.54 ± 9.12 | 0.68          | -      | -            |
| Right breast                           | 4.99          | 3.62 ± 4.70   | 9.25 ± 5.01  | 22.37 ± 28.21 | -      | 11.80 ± 9.63 |
| Left/right mean                        | 7.60 ± 3.68   | 8.73 ± 7.22   | 11.90 ± 3.74 | 1.23 ± 0.78   | -      | -            |

Values represent means ± standard deviations (when multiple observations occur). Milk samples were collected from 10 participants. In total, there were 16 milk samples: 3 in week 1, 4 in week 2, 4 in week 3, 3 in week 4, 0 in week 5, 2 in week 6.
